# Supplementary material
Source: PubMed Central journal article supplement (PMC4764381)
Supplement: NIHMS747413-supplement-supplement_1.pdf [file NIHMS747413-supplement-supplement_1.pdf]

Supplementary Table 1. Missing Data (N=542 Patients)

| Variable                              | n (%)    |
|---------------------------------------|----------|
| <b>Clinical Factors</b>               |          |
| Age at cancer diagnosis (years)       | 0        |
| Tumor histology                       | 0        |
| Cancer stage                          | 0        |
| Grade                                 | 2 (0.4)  |
| Ascites present at surgery            | 103 (19) |
| Postoperative residual disease        | 82 (15)  |
| <b>Lifestyle/Reproductive Factors</b> |          |
| Age at menarche (years)               | 126 (23) |
| Oral contraceptive use                | 40 (7)   |
| Parity and age at first birth (years) | 37 (7)   |
| Education                             | 70 (13)  |
| Smoking status                        | 37 (7)   |
| <b>Tumor Protein Expression</b>       |          |
| ARID1A                                | 38 (7)   |
| Beta 2 defensin                       | 73 (14)  |
| CD8                                   | 66 (12)  |
| CD68                                  | 85 (16)  |
| DKK1                                  | 52 (10)  |
| ER                                    | 42 (8)   |
| Fibrinogen                            | 79 (15)  |
| FOLR1                                 | 37 (7)   |
| gp96                                  | 53 (10)  |
| Heparan sulfate                       | 76 (14)  |
| Heparanase                            | 83 (15)  |
| High-mobility group box 1             | 81 (15)  |
| HNF1B                                 | 42 (8)   |
| hsp60                                 | 57 (11)  |
| hsp70                                 | 39 (7)   |
| IkappaBalpha                          | 60 (11)  |
| IKKB                                  | 68 (13)  |
| MDM2                                  | 50 (9)   |
| MMP9                                  | 78 (14)  |
| MyD88                                 | 78 (14)  |
| p16                                   | 43 (8)   |
| p50                                   | 83 (15)  |
| p53                                   | 47 (9)   |
| p65                                   | 50 (9)   |
| Phospho-IkappaBalpha                  | 65 (12)  |
| Phospho-p65                           | 61 (11)  |
| PR                                    | 52 (10)  |
| TFF3                                  | 48 (9)   |
| TLR4                                  | 73 (14)  |
| Vimentin                              | 51 (9)   |
| WT1                                   | 39 (7)   |

**Supplemental Table 2. Univariate Associations with Ovarian Cancer using Imputation of Missing Data**

| <b>Variable</b>                       | <b>Level</b>          | <b>HR (95% CI)</b> |
|---------------------------------------|-----------------------|--------------------|
| <b>Clinical Factors</b>               |                       |                    |
| Age at cancer diagnosis (years)       | <50                   | ref                |
|                                       | 50-59                 | 1.02 (0.74-1.41)   |
|                                       | 60-69                 | 1.15 (0.84-1.57)   |
|                                       | 70+                   | 1.62 (1.20-2.19)   |
| Tumor histology                       | Serous                | Ref                |
|                                       | Endometrioid          | 0.22 (0.10-0.49)   |
|                                       | Clear Cell            | 0.30 (0.21-0.42)   |
|                                       | Mucinous              | 0.50 (0.32-0.80)   |
|                                       | Other                 | 0.80 (0.51-1.28)   |
| Cancer stage                          | 1                     | ref                |
|                                       | 2                     | 1.88 (1.02-3.47)   |
|                                       | 3                     | 5.85 (3.84-8.91)   |
|                                       | 4                     | 10.09 (6.38-15.98) |
| Grade                                 | Low                   | ref                |
|                                       | High                  | 3.54 (2.49-5.04)   |
| Ascites present at surgery            | No                    | ref                |
|                                       | Yes                   | 2.37 (1.89-2.96)   |
| Postoperative residual disease        | None                  | ref                |
|                                       | ≤1cm                  | 3.21 (2.53-4.07)   |
|                                       | >1cm                  | 4.46 (3.28-6.06)   |
| <b>Lifestyle/Reproductive Factors</b> |                       |                    |
| Age at menarche (years)               | ≤11                   | ref                |
|                                       | 12                    | 1.00 (0.70-1.43)   |
|                                       | 13                    | 0.92 (0.64-1.32)   |
|                                       | 14+                   | 1.11 (0.81-1.53)   |
| Oral contraceptive use                | Never                 | ref                |
|                                       | Ever                  | 0.88 (0.72-1.07)   |
| Parity/age at first birth             | Nulliparous           | ref                |
|                                       | 1-2, ≤20 years        | 0.91 (0.58-1.42)   |
|                                       | 1-2, >20 years        | 1.02 (0.75-1.38)   |
|                                       | 3+ , ≤20 years        | 1.21 (0.86-1.70)   |
|                                       | 3+ >20 years          | 1.29 (0.95-1.75)   |
| Education                             | Less than high school | ref                |
|                                       | Finished high school  | 1.06 (0.69-1.62)   |
|                                       | More than high school | 0.97 (0.65-1.44)   |
| Smoking status                        | Never                 | ref                |
|                                       | Ever                  | 1.09 (0.89-1.34)   |
| <b>Tumor Protein Expression</b>       |                       |                    |
| ARID1A                                | <1%-50% positive      | ref                |
|                                       | >50% positive         | 1.51 (1.07-2.13)   |
| Beta 2 defensin                       | None                  | ref                |
|                                       | Weak                  | 0.90 (0.53-1.51)   |
|                                       | Moderate/Strong       | 0.80 (0.49-1.29)   |
| CD68                                  | None/Weak             | ref                |
|                                       | Moderate              | 1.27 (0.99-1.62)   |
|                                       | Strong                | 1.33 (0.99-1.79)   |
| CD8                                   | None/Weak             | ref                |
|                                       | Moderate              | 0.96 (0.75-1.22)   |
|                                       | Strong                | 0.66 (0.45-0.97)   |
| DKK1                                  | Negative (<1%)        | ref                |
|                                       | 1-50% positive        | 0.97 (0.74-1.26)   |
|                                       | >50% positive         | 0.42 (0.23-0.75)   |
| ER                                    | Negative (<1%)        | ref                |
|                                       | 1-50% positive        | 1.23 (0.89-1.69)   |
|                                       | >50% positive         | 0.88 (0.69-1.13)   |
| Fibrinogen                            | None                  | ref                |
|                                       | Weak/Moderate/Strong  | 0.95 (0.65-1.38)   |

| Variable                  | Level                                     | HR (95% CI)      |
|---------------------------|-------------------------------------------|------------------|
| FOLR1                     | Negative (<1%)                            | ref              |
|                           | Weak cyto, membr                          | 1.29 (0.95-1.77) |
|                           | Moderate/strong cyto, heterogeneous memb  | 1.59 (1.16-2.17) |
|                           | Full diffuse cyto, consistent strong memb | 1.43 (0.98-2.08) |
| gp96                      | None                                      | ref              |
|                           | Weak                                      | 0.73 (0.43-1.23) |
|                           | Moderate/Strong                           | 0.61 (0.37-1.01) |
| Heparan sulfate           | None/Weak                                 | ref              |
|                           | Moderate/Strong                           | 1.21 (0.99-1.49) |
| Heparanase                | None                                      | ref              |
|                           | Weak                                      | 0.86 (0.69-1.07) |
|                           | Moderate/Strong                           | 0.83 (0.59-1.18) |
| High-mobility group box 1 | None                                      | ref              |
|                           | Weak                                      | 0.80 (0.65-1.00) |
|                           | Moderate/Strong                           | 0.99 (0.68-1.45) |
| HNF1B                     | Negative (<1%)                            | ref              |
|                           | 1-50% positive                            | 0.73 (0.53-1.02) |
|                           | >50% positive                             | 0.66 (0.46-0.95) |
| hsp60                     | Weak                                      | ref              |
|                           | Moderate/Strong                           | 1.22 (0.96-1.56) |
| hsp70                     | Low                                       | ref              |
|                           | Medium                                    | 1.46 (1.15-1.86) |
|                           | High                                      | 1.12 (0.86-1.45) |
| IkappaBalpha              | None                                      | ref              |
|                           | Weak                                      | 0.87 (0.67-1.13) |
|                           | Moderate/Strong                           | 0.83 (0.61-1.12) |
| IKKB                      | None                                      | ref              |
|                           | Weak                                      | 0.90 (0.70-1.16) |
|                           | Moderate/Strong                           | 0.97 (0.71-1.31) |
| MDM2                      | Negative (<1%)                            | ref              |
|                           | ≥1% positive                              | 0.60 (0.47-0.77) |
| MMP9                      | None                                      | ref              |
|                           | Weak                                      | 0.80 (0.64-1.01) |
|                           | Moderate/Strong                           | 0.82 (0.54-1.24) |
| MyD88                     | None/Weak                                 | ref              |
|                           | Moderate                                  | 1.39 (1.02-1.90) |
|                           | Strong                                    | 1.55 (1.15-2.10) |
| p16                       | Negative (<1%)                            | ref              |
|                           | 1-50% positive                            | 1.36 (0.76-2.42) |
|                           | >50% positive                             | 1.93 (1.11-3.36) |
| p50                       | None                                      | ref              |
|                           | Weak                                      | 0.90 (0.68-1.19) |
|                           | Moderate/Strong                           | 0.72 (0.53-0.98) |
| p53                       | Negative (<1%)                            | ref              |
|                           | 1-50% positive                            | 0.58 (0.43-0.78) |
|                           | >50% positive                             | 1.16 (0.89-1.53) |
| p65                       | None/Weak                                 | ref              |
|                           | Moderate/Strong                           | 1.31 (0.91-1.90) |
| Phospho-IkappaBalpha      | None                                      | ref              |
|                           | Weak/Moderate/Strong                      | 0.87 (0.71-1.08) |
| Phospho-p65               | None                                      | ref              |
|                           | Weak                                      | 0.87 (0.62-1.23) |
|                           | Moderate/Strong                           | 0.91 (0.64-1.31) |
| PR                        | Negative (<1%)                            | ref              |
|                           | 1-50% positive                            | 0.76 (0.60-0.97) |
|                           | >50% positive                             | 0.43 (0.31-0.60) |
| TFF3                      | Negative (<1%)                            | ref              |
|                           | 1-50% positive                            | 0.82 (0.63-1.07) |
|                           | >50% positive                             | 0.34 (0.23-0.51) |
| TLR4                      | None/Weak                                 | ref              |

| <b>Variable</b> | <b>Level</b>   | <b>HR (95% CI)</b> |
|-----------------|----------------|--------------------|
|                 | Moderate       | 1.19 (0.95-1.50)   |
|                 | Strong         | 1.57 (1.18-2.11)   |
| Vimentin        | Negative (<1%) | ref                |
|                 | 1-50% positive | 0.64 (0.49-0.85)   |
|                 | >50% positive  | 0.72 (0.50-1.03)   |
| WT1             | Negative (<1%) | ref                |
|                 | 1-50% positive | 1.88 (1.35-2.62)   |
|                 | >50% positive  | 2.33 (1.79-3.03)   |

Abbreviations: HR, hazard ratio; CI, confidence interval; memb., membrane staining; cyto, cytoplasmic staining; Cox regression of multiple imputed data.
